# Supplementary material
Source: publisher figshare collection journal article supplement (https://acs.figshare.com/ndownloader/files/4555060)

# Supporting Information

## Electrochemical reduction of oriented graphene oxide films: An *in-situ* Raman spectroelectrochemical study

Ganganahalli K. Ramesha and Srinivasan Sampath\*

Department of Inorganic and Physical Chemistry

Indian Institute of Science, Bangalore 560 012, India

**Scheme S1:** Schematics of formation of GO film on self assembled monolayer of cystamine on gold substrate.

**Scheme S2:** Schematic diagram of *in-situ* spectroelectrochemical measurements. The left top corner shows the schematics for the GO SAM with cystamine. The right side shows the photograph of the set-up.

**Figure S1:** Variation in the intensities of D /G bands as a function of applied potential

**Figure S2:** C-AFM images of GO before (a and b) and after (c and d) reduction. Images (a) and (c) are C-AFM topography images. Images (c) and (d) are C-AFM current images.

**Scheme S1:** Schematics of formation of GO film on self assembled monolayer of cystamine on gold substrate.

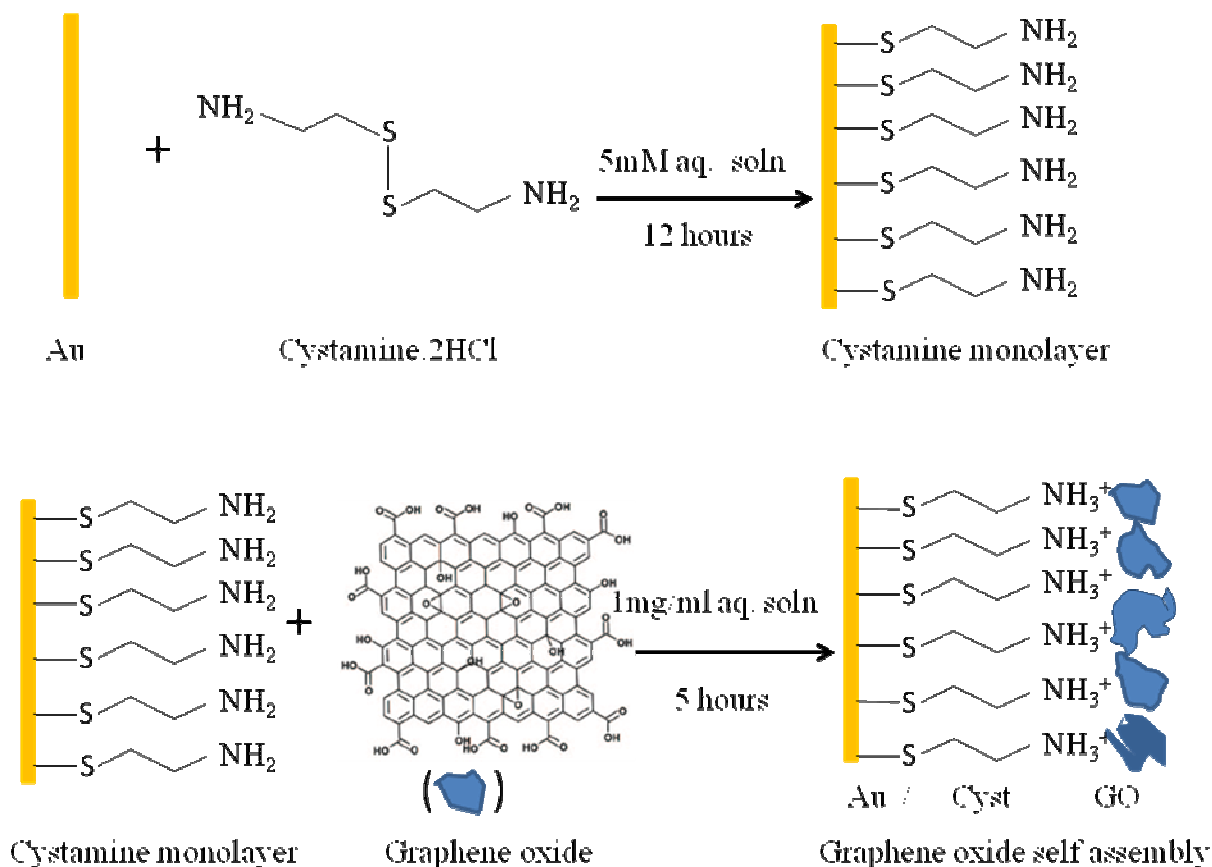

**Scheme S2:** Schematic diagram of *in-situ* spectroelectrochemical measurements. The left top corner shows the schematics for the GO SAM with cystamine. The right side shows the photograph of the set-up.

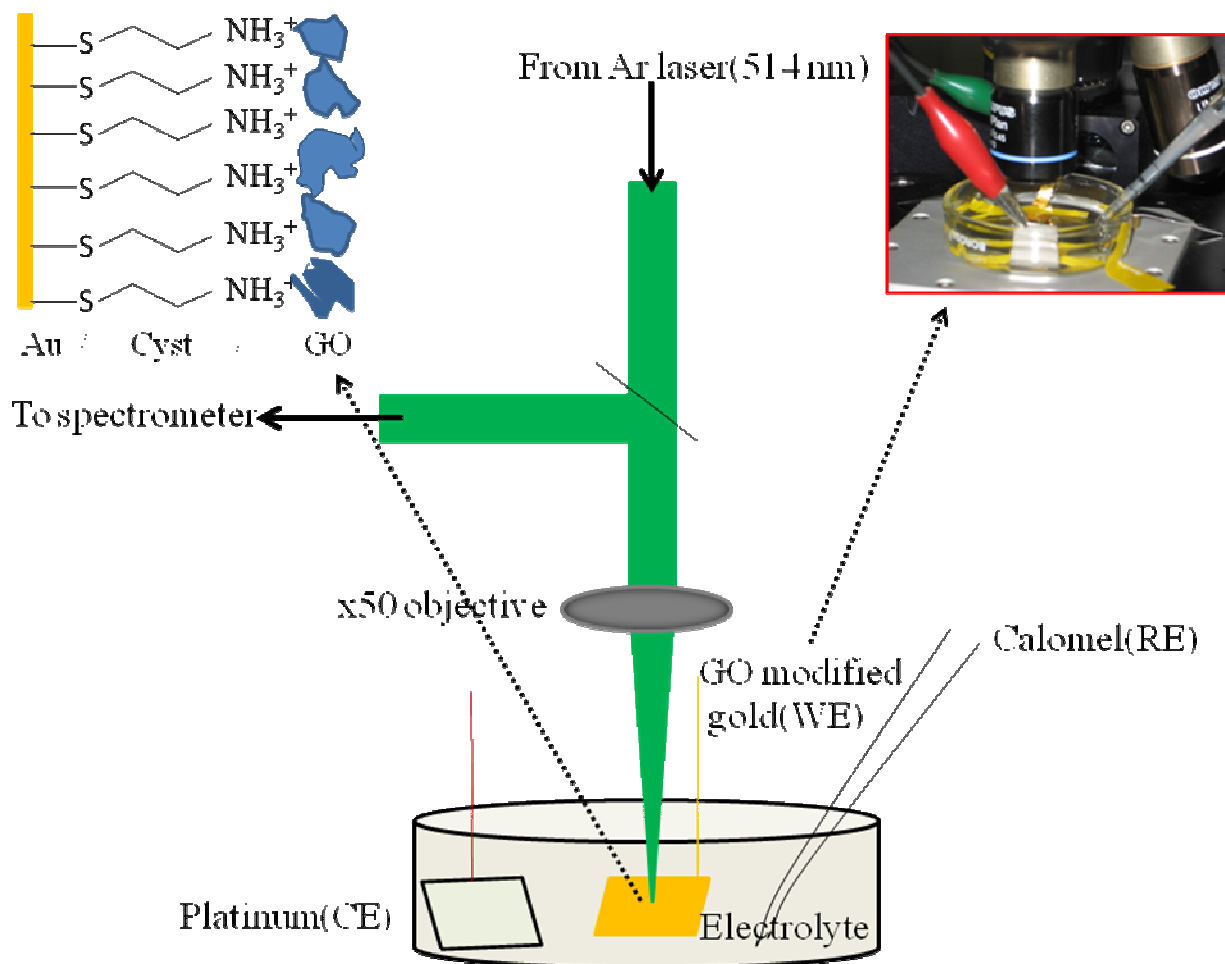

**Figure S1:** Variation in the intensities of D /G bands as a function of applied potential versus SCE.

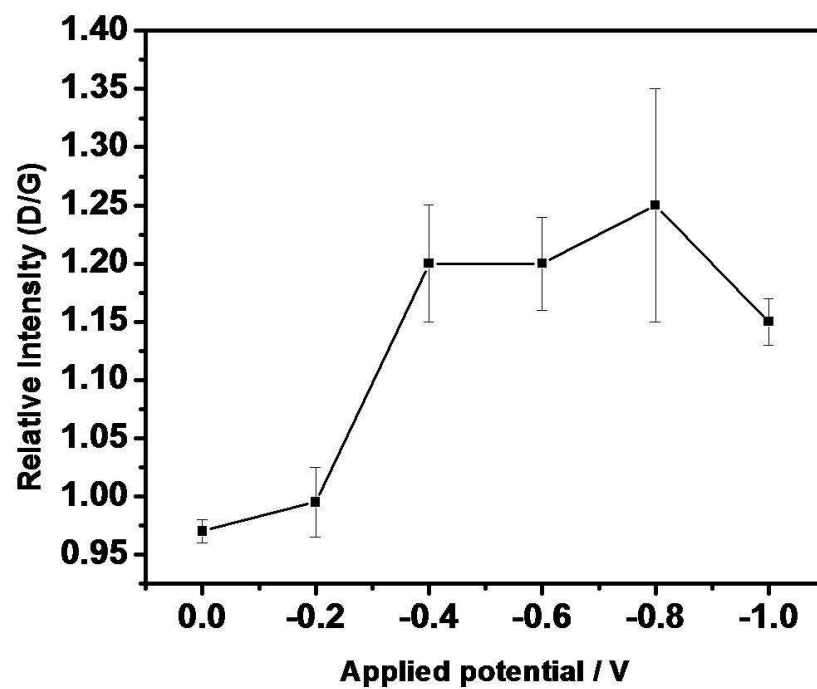

**Figure S2:** C-AFM images of GO before (a and b) and after (c and d) reduction. Images (a) and (c) are C-AFM topography images. Images (c) and (d) are C-AFM current images. Applied potential 2V.

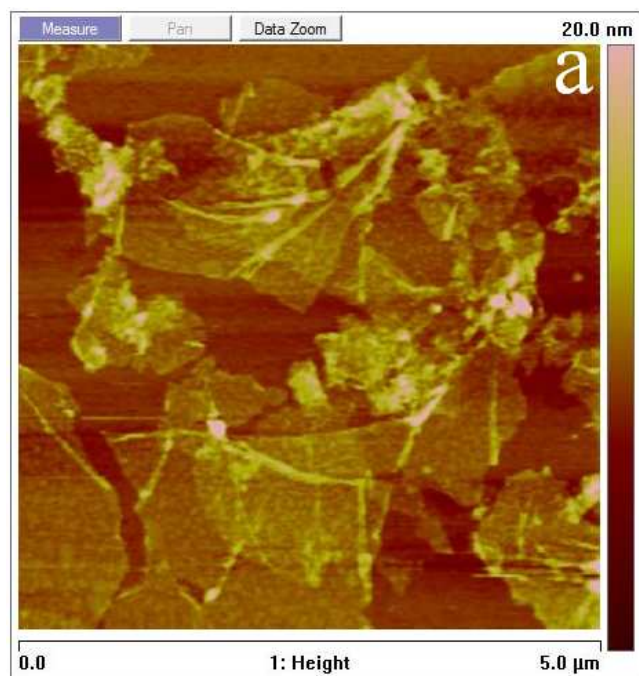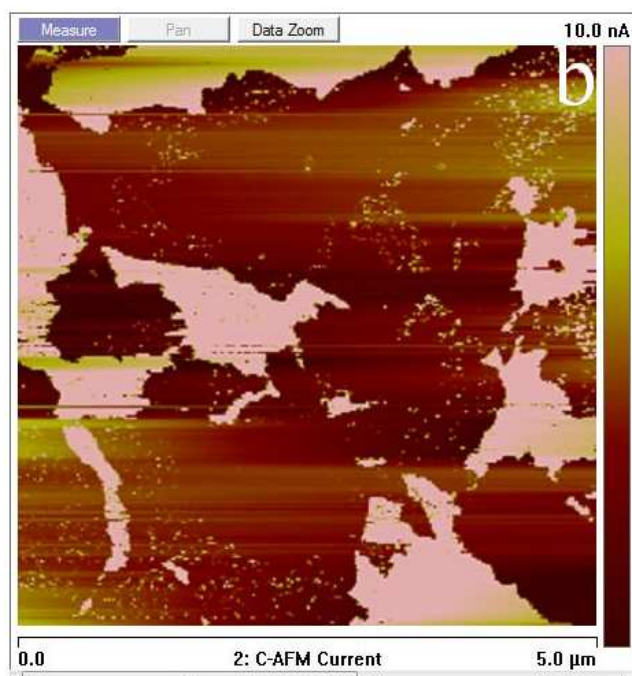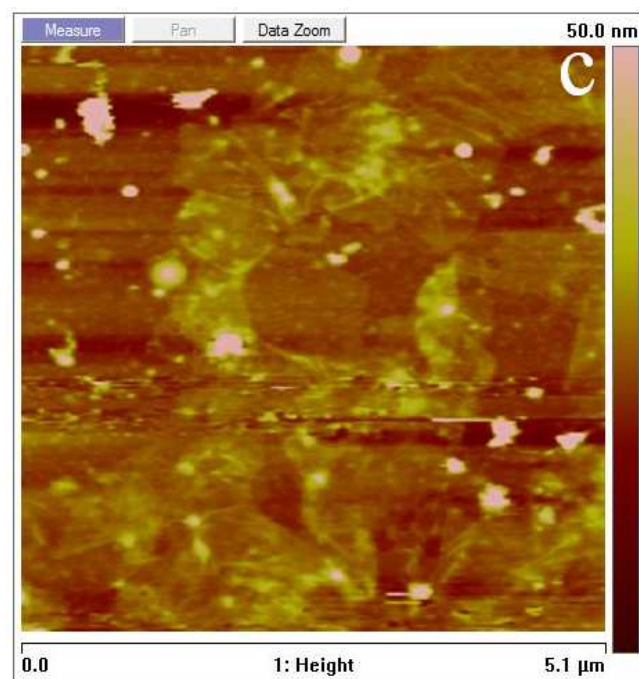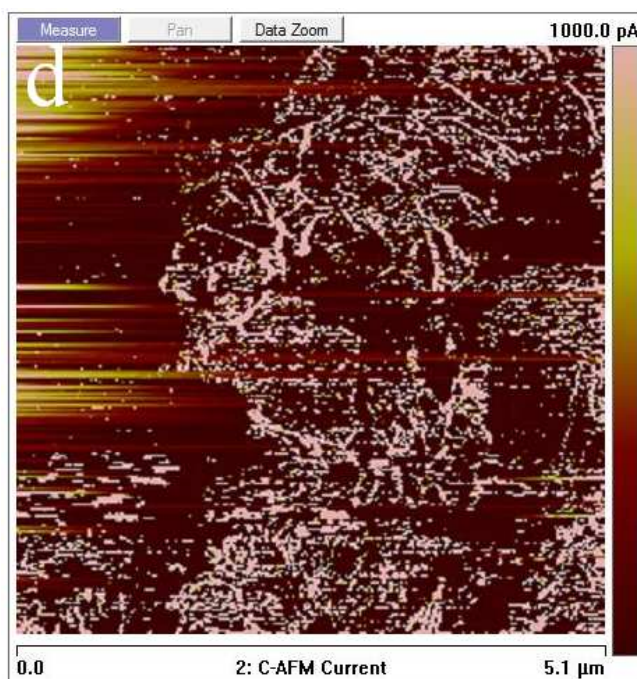

Supplement: Supplementary file 1 [file 4555060]
